# Supplementary material
Source: Research Square preprint supplement (doi:10.21203/rs.3.rs-9453160/v1)

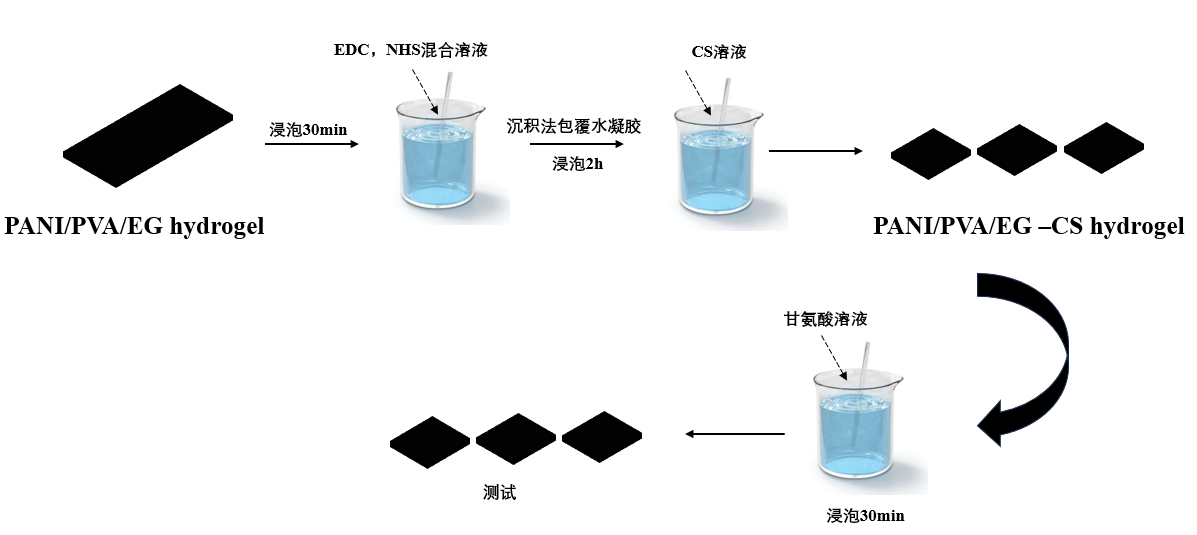


Scheme 1 Preparation and synthesis diagram of hydrogel PANI/PVA/EG-CS

Supplement: Supplementary file 1 [file 9365e9cb0be4533101cf2b83.docx]
